1 **Prevalence of cardiometabolic risk factors according to urbanization level,**  
2 **gender and age, in apparently healthy adults living in Gabon, Central Africa**

3 Mérédith Flore ADA MENGOME<sup>1,2¶</sup>, Héléna Néoline KONO<sup>1,2¶</sup>, Elsa AYO BIVIGOU<sup>3&</sup>, Noé  
4 Patrick M'BONDOUKWE<sup>1&</sup>, Jacques-Mari NDONG NGOMO<sup>1&</sup>, Bridy MOUTOMBI  
5 DITOMBI<sup>1&</sup>, Bedrich PONGUI NGONDZA<sup>1&</sup>, Cyrille BISSEYE<sup>2</sup>, Denise Patricia MAWILI-  
6 MBOUMBA<sup>1</sup>, Marielle Karine BOUYOU AKOTET<sup>1\*</sup>.

7 <sup>1</sup>Département de Parasitologie-Mycologie, Université des Sciences de la Santé (USS),  
8 Libreville, Gabon

9

10 <sup>2</sup>Laboratoire de Biologie Moléculaire et Cellulaire (LABMC), Université des Sciences et  
11 Techniques de Masuku (USTM), Franceville, Gabon

12

13 <sup>3</sup>Département de Médecine, Faculté de Médecine, Université des Sciences de la Santé,  
14 Libreville, Gabon.

15

16 **\*Corresponding author:**

17 **E-mail:** [mariellebouyou@gmail.com](mailto:mariellebouyou@gmail.com) ( MKBA)

18 <sup>¶</sup>These authors contributed equally to this work

19 <sup>&</sup>These authors also contributed equally to this work

20

21

22

23

## 24 **Abstract**

25 The prevalence of cardiometabolic risk factors (CMRFs) is increasing in sub-Saharan Africa and  
26 represents a serious health issue. Specific and accurate data are required to implement prevention  
27 programs and healthcare strategies. Thus, the aim of this study was to estimate the prevalence rates  
28 of CMRFs according to the level of urbanization, age and gender in Gabon.

29 A cross-sectional study was conducted using the World Health Organization's (WHO) stepwise  
30 approach for the surveillance of chronic disease risk factors. Participants over 18 years of age,  
31 without known underlying disease, from rural and urban areas of Gabon were included. Biological  
32 and behavioral data were collected using an adapted version of the standardized WHO survey  
33 questionnaire.

34 The median age was 38[28-50] years. Tobacco consumption was more frequent in rural areas than  
35 in urban areas (26.1% vs 6.2%;  $p < 0.01$ ). Men were more likely to be smokers than women, in  
36 both settings (aOR: 8.0[4.9-13.5],  $p < 0.01$ ). Excessive alcohol consumption (19.4% vs 9.6%;  $p <$   
37 0.01) predominated in rural than in urban areas. Urban dwellers were less physically active than  
38 rural people (29.5% vs 16.3%;  $p < 0.01$ ). In total, 79.9% of participants aged under 54 years had a  
39 high blood pressure (HBP) while 10.6% of the younger participants had pre-hypertension.  
40 Metabolic syndrome was higher in women (21.7% vs 10.0%;  $p < 0.01$ ) than in men. Furthermore,  
41 6.4% of men and 2.5% of women had a high risk of developing coronary heart diseases in the next  
42 10 years ( $p = 0.03$ ). Finally, 54.0% of the study population had three or four risk factors.

43 The prevalence rates of CMRFs were high in the study population. Disparities were observed  
44 according to urban and rural areas, gender and age groups. National prevention and healthcare

45 strategies for cardiometabolic diseases in Gabon should take into account these observed  
46 differences.

47

## 48 **Introduction**

49 Cardiovascular diseases (CVD) are the most common non-communicable disease (NCD).  
50 In 2019, CVD were responsible for an estimated 17.9 million deaths worldwide, of which more  
51 than three quarters occurred in low- and middle-income countries [1]. The increasing rate of deaths  
52 due to CVD remains a serious health concern. By 2030, 23 million people are expected to die from  
53 CVD, stroke and coronary heart diseases being the leading factors of these deaths. In sub-Saharan  
54 Africa (SSA), an increased prevalence rate of NCD, especially CVD, has been observed in the past  
55 30 years. Ischemic heart diseases have now become a major leading cause of death in SSA,  
56 surpassing other major infectious diseases (malaria, tuberculosis and intestinal infections) [2].

57 Cardiometabolic diseases (CMD) are related to modifiable and non-modifiable risk factors  
58 (RF). Indeed, risk factors such as age, hypertension, diabetes, dyslipidemia, tobacco smoking,  
59 physical inactivity, high alcohol consumption, insufficient fruit/vegetable consumption and high  
60 fat intake are considered to be directly linked to the occurrence of CMD. High blood pressure  
61 (HBP) levels accelerate the risk of stroke and coronary heart disease. Likewise, people with  
62 diabetes are twice as likely to develop CVD. Physical inactivity is one of the lifestyle factors which  
63 promotes the onset of obesity, HBP, diabetes mellitus and an abnormal lipid profile. In SSA, HBP,  
64 type 2 diabetes, overweight and obesity were shown to be the most prevalent cardiometabolic risk  
65 factors (CMRF) [3].

66           Moreover, there has been a rapid increase of urbanization in SSA as well as significant  
67 population growth and aging in the past decades. Rapid and unplanned urbanization has been  
68 shown to contribute to the increase of CMD prevalence due to the increase of risk factors [4].  
69 Indeed, unplanned urbanization is always characterized by the absence of spaces dedicated to  
70 physical activity. Furthermore, the urban environment provides an abundant market for the  
71 consumption of tobacco, alcohol and unhealthy food [5, 6].

72           Previous studies performed in high- and low-income countries highlighted disparities in the  
73 prevalence and types of CMRF in urban versus rural settings. For instance, in Cameroon, a higher  
74 prevalence of obesity (17.1%) and hyperglycemia (10.4%) has been reported in urban areas  
75 compared to rural areas [7]. In a study carried out in Burkina Faso, HBP was found in 24.8% and  
76 15.4% of individuals living in urban and rural areas, respectively [8]. Furthermore, differences in  
77 the rates of risk factors according to gender have been described as well. Obesity and abdominal  
78 obesity are more often observed in women while men have a higher tobacco consumption [9, 10].

79           In Gabon, data on the burden of CMD and CMRF are scarce. Nevertheless, previous studies  
80 reported a non-negligible incidence of CVD (13.3%) and the prevalence of diabetes was estimated  
81 at 19.6% [11, 12]. Furthermore, according to the WHO global health statistics, one in five people  
82 is considered obese and in 2018, 17% of deaths were related to CVD [13]. In the same way, a high  
83 prevalence of HBP was described in young students [14]. It was recently shown that in SSA, the  
84 increased morbidity and mortality rates of CMD are a consequence of inefficient prevention  
85 programs and healthcare strategies [15]. The lack of data on CMD and their risk factors are key  
86 impediments to implement efficient control efforts. Recent data are required to develop awareness  
87 programs, to prioritize preventive measures and to adapt healthcare strategies according to urban  
88 and rural areas. As such, in order to better contextualize future prevention and healthcare strategies,

89 it is important to characterize the burden of CMRF according to sociodemographic factors (age,  
90 gender) and urbanization levels in Gabon.

91 Thus, the aim of this study was to estimate the prevalence rates of CMRF in urban and rural areas  
92 of Gabon.

## 93 **Material and methods**

### 94 **Study sites**

95 A prospective, cross-sectional and observational study was carried out from September  
96 2020 to November 2021 in two urban areas (Melen and Libreville) and two rural areas (Bitam and  
97 Koula-Moutou) in Gabon. Melen is located in the fifth district of Libreville, the capital city. This  
98 district has 148,129 inhabitants. Koula-Moutou is located 586.9 km southeast from the capital, in  
99 the Ogooué-Lolo province. Bitam is located in the north of Gabon, 592 km from Libreville, in the  
100 Woleu-Ntem province. The Ogooué-Lolo and Woleu-Ntem provinces are the fourth and seventh  
101 most populated provinces in Gabon with 65,771 and 154,986 inhabitants, respectively. In these  
102 rural areas, the main activities of the population are agriculture, fishing and hunting.

103 The study was performed in Melen at the Centre de Recherche Biomédicale en Pathogènes  
104 Infectieux et Pathologies Associées (CREIPA), in Libreville at the Centre Hospitalier Universitaire  
105 de Libreville (CHUL), in Koula-Moutou at the Centre Hospitalier Régional Paul Moukambi  
106 (CHRPM), and in Bitam at the Centre Médical de Bifolossi.

107

108

## 109 **Study population**

110 The study population was recruited through awareness campaigns in healthcare centers and  
111 in the community. Volunteers aged more than 18 years old, with negative malaria, HIV, hepatitis,  
112 tuberculosis tests, without known underlying disease, who had been residing in the four study sites  
113 for at least two years, and who gave their consent to participate were included. Pregnant women  
114 were not included.

## 115 **Sample size calculation**

116 The sample size was calculated with the formula used to estimate a sample proportion:

$$117 \quad (n = z^2 p(1-p)/e^2)$$

118 And the reported prevalence of cardiovascular disease in Gabon of 17%, in the absence of previous  
119 data on CMDRF [12]. The significance level was 5%. Considering a non-response rate of 10%, the  
120 minimum sample size was 239 included participants for rural and urban areas.

## 121 **Data collection and physical examination**

122 Data were collected using an adapted version of the standardized WHO survey  
123 questionnaire by a team composed of experienced medical doctors, nurses and biologists [16]. The  
124 first phase of the study included a face to face interview with participants, during which they were  
125 asked about their socio-demographic data and their lifestyle characteristics such as tobacco and  
126 alcohol consumption, dietary habits (fruit, vegetable and salt consumption), physical activity. In  
127 addition, information on their past or current medication for HBP or diabetes was also recorded. In  
128 the second phase of the study, anthropometric measurements such as height, weight and waist  
129 circumference were taken. Height and weight were measured using a height gauge and an electronic

130 scale, respectively. Participants were weighed without shoes and wearing only light clothing.  
131 Measurements were recorded to the nearest 0.5 centimeter for height and 0.1 kg for weight. Body  
132 mass index (BMI) was calculated according to the following formula: weight (kg)/ height squared  
133 (m<sup>2</sup>). Waist circumference was measured (in cm) in a standing position, by measuring the midpoint  
134 between the lower margin of the last palpable rib and the top of the iliac crest, according to the  
135 WHO recommendations [16]. Blood pressure (BP) and heart rate were measured in the sitting  
136 position, on the left arm of each participant using an automatic blood pressure monitor (OMRON  
137 M3 Comfort, Kyoto, Japon) after 3 minutes of rest. Three measurements were performed 3 minutes  
138 apart and the average values of the two closest values of BP and heart beats were recorded.

## 139 **Biological analysis**

140 After completing the questionnaire form and the physical examination, blood samples were  
141 collected in the morning from participants who had fasted for 12 hours. Blood glucose, total  
142 cholesterol (Total-C), HDL cholesterol (HDL-C), then LDL cholesterol (LDL-C) and triglyceride  
143 (TG) concentrations were measured using the PentraC200 analyzer (HORIBA ABX SAS, France).

## 144 **Quality procedure**

145 Throughout the study, measurements were performed by two independent technicians.  
146 Participants with HBP and high fasting glucose levels, detected during screening, were seen 15  
147 days later by the study team. If the same trends were observed, they were classified as having HBP  
148 or hyperglycemia. In the case of diagnosis confirmation, they were referred to the physician of the  
149 nearest health centre or case management. Data obtained were all comparable. Double data entry  
150 was carried out to minimize the risk of data entry errors.

## 151 **Definition of variables**

152           The variables were defined based on WHO criteria [16]. Smokers were distributed into  
153 three groups: the first group included all tobacco users; the second group consisted of daily smokers  
154 (i.e. individuals who smoked at least one cigarette per day); the third group consisted of occasional  
155 smokers (i.e. people who smoke between 1 to 3 cigarettes per week). Passive smokers were people  
156 who had experienced passive smoking at home or at work during the 30 days prior to the day of  
157 the screening. Two groups were created for alcohol consumption: people who had consumed at  
158 least one alcoholic drink during the 12 last months, and those with excessive alcohol consumption,  
159 i.e. with more than 4 alcoholic drinks (12 g of ethanol) consumed per week. Different kinds of  
160 bottles or boxes were presented to the volunteers to allow the team to estimate the amount of  
161 drinking. After each volunteer reported the number of bottles or boxes he consumed, the physician  
162 estimated the standard quantity of drink which corresponded to 12 g of ethanol according to the  
163 most frequent type of drink available in the country (unpublished data). The number of fruit and/or  
164 vegetable intake per day was also assessed: an intake of less than 5 fruits or vegetables per day was  
165 considered as insufficient. Salt consumption was also evaluated and individuals were ranked  
166 according to their habits: occasional or excessive salting when cooking, adding salt before eating  
167 or usual consumption of salty additives with food.

168           Physical activity was estimated depending on the volunteers' occupation, household  
169 activities, walking and physical activities during their free time. A physical activity <150 minutes  
170 per week was considered insufficient and a sedentary lifestyle was characterized by the fact of  
171 spending 12 hours of time sitting or lying down over the course of a day.



172 A metabolic syndrome was diagnosed according to the definition established by the  
173 International Diabetes Federation in 2005 [17]. The diagnosis was based on the combination of at  
174 least three of the five following RF: elevated triglycerides ( $>1.7$  mmol/L); abdominal obesity (waist  
175 circumference  $\geq 94$  cm in men;  $\geq 80$  cm in women); systolic blood pressure  $\geq 130$  mmHg and/or  
176 diastolic blood pressure  $\geq 85$  mmHg or treated hypertension, fasting blood glucose  $\geq 5.56$  mmol/L  
177 or treated diabetes mellitus; low HDL cholesterol (HDL-C  $<1.03$  mmol/L men, HDL-C  $<1.29$   
178 mmol/L women). Abnormal lipid levels were classified according to the Adult Treatment Panel III  
179 criteria as follows: high total cholesterol (Total-C  $\geq 6.2$  mmol/L), low HDL cholesterol (HDL-C  
180  $<1$  mmol/L); high LDL cholesterol (LDL-C  $\geq 4.1$  mmol/L) and high triglyceride levels (TG  $>2.26$   
181 mmol/L) [18].

182 HBP was defined as systolic blood pressure  $\geq 130$  mmHg and diastolic blood pressure  $\geq 80$  mmHg  
183 or when participants followed a treatment for HBP. Pre-hypertension was defined as systolic blood  
184 pressure between 120-129 mmHg and diastolic blood pressure between 70-79 mmHg [14]. An  
185 elevated heart rate amounted to  $>80$  beat/min. High fasting blood glucose levels were defined by  
186 venous blood glucose levels  $\geq 5.6$  mmol/L after at least 12-hour fasting. Diabetes was defined when  
187 individuals followed treatment for diabetes mellitus. A BMI between 25 kg/m<sup>2</sup> and 29 kg/m<sup>2</sup> was  
188 considered as overweight, and obesity was defined as a BMI over 30 kg/m<sup>2</sup>. Abdominal obesity  
189 was defined for a waist circumference  $\geq 94$  cm in men and  $\geq 80$  cm in women.

190 The Framingham risk score for coronary heart disease was used to estimate the 10-year  
191 cardiovascular risk of the volunteers. The factors used in the calculation included age, gender,  
192 diabetes, smoking, SBP, DBP, Total-C and HDL-C. The cardiovascular risk score was categorized  
193 as low ( $<10\%$ ), intermediate (10%-19%), and high ( $\geq 20\%$ ) as recommended [19].

194           The following eleven biological and behavioral RF were used to assess the number of CMD  
195 risk factors in the age groups of the study population: HBP, hyperglycemia, diabetes, obesity,  
196 overweight, abdominal obesity, dyslipidemia, tobacco use, excessive alcohol consumption, low  
197 fruit/vegetable consumption, insufficient physical activity. Metabolic syndrome was considered as  
198 a group of RF.

## 199 **Ethical considerations**

200           Ethical clearance and approval were obtained from the National Ethics Committee under  
201 the reference PROT N°002/2020/PR/SG/CNE. The study also received administrative  
202 authorization from the Ministry of Health (which is the national regulatory authority), as well as  
203 from the local administrators of each the study areas. All persons approached, including the  
204 authorities, were informed about the objectives of the study, the procedures, what was expected of  
205 the potential participants, the possible risks and benefits for them. For the illiterate participants, a  
206 local community member, previously trained by the research team, gave them information in the  
207 local language. Written and signed informed consent was obtained from each participant. A  
208 fingerprint was used as a signature for the illiterates who were accompanied by a witness who also  
209 signed the consent form. According to the National Ethics Committee requirement, the participants,  
210 aged below 21 years old, who agreed to participate signed a written assent form of consent and  
211 their parents or legal guardians provided a signed informed consent, after verification of their  
212 parental relationship. All participants and guardians were clearly informed about the study  
213 procedures, interest, potential risks and benefits, and their rights. Participants with abnormal  
214 clinical or biological data were conducted to the site health facility for appropriate investigation  
215 and management.

## 216 **Statistical analysis**

217 Data were analyzed using Statistical Package for the Social Sciences (SPSS version 20) and  
218 Epi info (version 6). The data was further categorized according to areas, age group and gender.  
219 The normality of the data was checked by the Shapiro's and Kolmogorov-Smirnov test for  
220 quantitative variables. Since the variables did not follow a normal distribution, medians were  
221 compared between groups using the Mann-Whitney U test and proportions were compared using a  
222 chi-squared test. Univariate logistic regression was performed to assess the unadjusted association  
223 between the studied variable and the presence of CMRF. All variables that were associated with  
224 the presence of at least one CMRF with a  $p < 0.2$  in the univariate analysis were included in the  
225 respective multivariable analysis. A multivariate multinomial logistic regression was used to  
226 determine the independent predictors of CMRF; we adjusted models for gender, areas of residence  
227 and age. Adjusted odds ratio (aOR) and cOR were reported at a 95% confidence interval (CI). All  
228 p-values are two-tailed, and  $p \leq 0.05$  was considered statistically significant.

## 229 **Results**

### 230 **Sociodemographic characteristics of the study population**

231 In all, 1098 volunteers were approached and 978 were interviewed, 499 in urban areas and  
232 479 in rural areas (Figure 1; Table 1). The results of the lipid measurements were available for 705  
233 participants, 458 volunteers (154 men; 304 women) in urban areas and 247 volunteers (100 men;  
234 147 women) in rural areas.

### 235 **Fig 1. Study flow chart**

236 Women represented almost 60.0% of the study population. The majority of the participants  
 237 were aged less than 54 years old (83.5%) and the median age was 38 years [ 28-50]. More than half  
 238 (55.6%) and almost two thirds (66.9%) of the participants were in a relationship (married or living  
 239 with a partner) and had at least a secondary school level education level (Table 1). Volunteers from  
 240 urban areas were younger ( $37 \pm 13.4$  vs  $41 \pm 11.6$  years), more likely to be unmarried (50.7% vs  
 241 26.3%), and had a higher education level (40.5% vs 4.4%) than rural participants ( $p < 0.01$ ) (Table  
 242 1).

243 **Table 1. Sociodemographic and socioeconomic characteristics of the study population.**

| Characteristics                      | Total (N = 978) | Urban area (n = 499) | Rural area (n = 479) |
|--------------------------------------|-----------------|----------------------|----------------------|
| <b>Gender n(%)</b>                   |                 |                      |                      |
| Male                                 | 405 (41.4)      | 172 (34.5)           | 233 (48.6)           |
| Female                               | 573 (58.6)      | 327 (65.5)           | 246 (51.4)           |
| <b>Age groups (years)</b>            |                 |                      |                      |
| 18-35                                | 422 (43.1)      | 255 (51.1)           | 167 (34.9)           |
| 36-53                                | 395 (40.4)      | 165 (33.1)           | 230 (48.0)           |
| >53                                  | 161 (16.5)      | 79 (15.8)            | 82 (17.1)            |
| <b>Mean age (<math>\pm</math>SD)</b> | $39.5 \pm 12.6$ | $37.9 \pm 13.4$      | $41.0 \pm 11.6$      |
| <b>Marital status n(%)</b>           |                 |                      |                      |
| Unmarried                            | 379 (38.8)      | 253 (50.7)           | 126 (26.3)           |
| Currently married                    | 261 (26.7)      | 134 (26.9)           | 127 (26.5)           |
| Living with a partner                | 283 (28.9)      | 91 (18.2)            | 192 (40.1)           |
| Separated/Divorced/Widowed           | 55 (5.6)        | 21 (4.2)             | 34 (7.1)             |
| <b>Education level n(%)</b>          |                 |                      |                      |
| No formal education                  | 53 (5.4)        | 23 (4.6)             | 30 (6.3)             |
| Primary school                       | 45 (4.6)        | 22 (4.4)             | 23 (4.8)             |
| Middle school                        | 507 (51.9)      | 157 (31.5)           | 350 (73.0)           |
| High school                          | 147 (15.0)      | 93 (18.6)            | 54 (11.3)            |
| University education                 | 223 (22.8)      | 202 (40.5)           | 21 (4.4)             |
| Refused to answer                    | 3 (0.3)         | 2 (0.4)              | 01 (0.2)             |
| <b>Occupation n(%)</b>               |                 |                      |                      |
| Public sector worker                 | 117 (12.0)      | 92 (18.4)            | 25 (5.2)             |
| Private sector employee              | 137 (14.0)      | 30 (6.0)             | 107 (22.3)           |
| Self-employed                        | 282 (28.8)      | 70 (14.0)            | 212 (44.3)           |
| Worker/domestic worker               | 72 (7.3)        | 55 (11.0)            | 17 (3.5)             |
| Students                             | 166 (17.0)      | 144 (28.9)           | 22 (4.6)             |
| Unemployed                           | 167 (17.1)      | 80 (16.0)            | 87 (18.2)            |
| Retired                              | 35 (3.6)        | 35 (3.6)             | 09 (1.9)             |
| Refused to answer                    | 02 (0.2)        | 02 (0.2)             | 00 (0.0)             |

245 **Prevalence of behavioral characteristics associated with**  
246 **cardiometabolic disease risk factors according to gender and area of**  
247 **residence**

248 Overall, 156 (16.0%) participants smoked. Men were more likely to be smokers than  
249 women, both in rural (aOR: 8.0[4.9-13.5],  $p < 0.01$ ) or urban settings (aOR : 4.0[1.8-8.4],  $p < 0.01$ )  
250 (Tables 2 and 4). Participants from rural areas were more frequently smokers (Table 2). Indeed,  
251 daily smokers (29.4% vs 19.8%,  $p < 0.01$ ) were more frequent in rural areas than in urban areas.  
252 Overall, 24.7 % of the study population was exposed to passive smoking at work or at home.

253

254

255

256

**Table 2. Behavioral characteristics associated with cardiometabolic disease risk factors according to study area and gender.**

| Risk factors                                   | Total      | Urban      |            | P-value <sup>a</sup> | Rural      |            | P-value <sup>b</sup> | Urban      | Rural      | P-value <sup>c</sup> |
|------------------------------------------------|------------|------------|------------|----------------------|------------|------------|----------------------|------------|------------|----------------------|
|                                                |            | Men        | Women      |                      | Men        | Women      |                      |            |            |                      |
| Tobacco consumption n(%)                       |            |            |            |                      |            |            |                      |            |            |                      |
| All tobacco users                              | 156 (16.0) | 20 (11.6)  | 11 (3.4)   | < 0.001              | 103 (44.2) | 22 (8.9)   | < 0.001              | 31 (6.2)   | 125 (26.1) | < 0.001              |
| Daily smokers during previous 12 months        | 106 (10.1) | 11 (6.4)   | 03 (1.0)   | < 0.001              | 84 (36.0)  | 08 (3.3)   | < 0.001              | 14 (2.8)   | 92 (19.2)  | < 0.001              |
| Occasional smokers                             | 50 (5.1)   | 09 (5.2)   | 08 (2.5)   | 0.020                | 19 (8.2)   | 14 (5.9)   | 0.163                | 17 (3.4)   | 33 (6.9)   | 0.013                |
| Passive smoking during previous 30 days        | 240 (24.5) | 44 (25.6)  | 55 (16.8)  | < 0.001              | 61 (26.2)  | 80 (32.5)  | 0.027                | 99 (19.8)  | 141 (29.4) | < 0.001              |
| Alcohol consumption during previous 12 months  | 640 (65.4) | 123 (71.5) | 206 (63.0) | 0.003                | 171 (73.4) | 140 (56.9) | < 0.001              | 329 (65.9) | 311 (64.9) | 0.741                |
| Excessive consumption during past 7 days       | 141 (14.4) | 30 (17.5)  | 18 (5.5)   | < 0.001              | 70 (30.0)  | 23 (9.4)   | < 0.001              | 48 (9.6)   | 93 (19.4)  | < 0.001              |
| Fruits and vegetables intake                   |            |            |            |                      |            |            |                      |            |            |                      |
| Number of fruits/days(m±SD)                    | 1.27 ± 1.2 | 1.20 ± 1.3 | 1.31 ± 1.3 | < 0.001              | 1.30 ± 1.2 | 1.23 ± 1.0 | 0.108                | 1.27 ± 1.3 | 1.27 ± 1.1 | 0.197                |
| Number of vegetables/day                       | 1.43 ± 0.8 | 1.28 ± 0.9 | 1.41 ± 0.8 | < 0.001              | 1.40 ± 0.8 | 1.59 ± 0.8 | 0.544                | 1.36 ± 0.8 | 1.50 ± 0.8 | 0.235                |
| Insufficient fruits/vegetables intake n(%)     | 859 (87.8) | 150 (87.2) | 282 (86.2) | 0.641                | 206 (88.4) | 221 (89.8) | 0.469                | 432 (86.6) | 427 (89.1) | 0.218                |
| Salt consumption n(%)                          |            |            |            |                      |            |            |                      |            |            |                      |
| Always/often adds additional salt during meals | 164 (16.8) | 30 (17.4)  | 61 (18.7)  | 0.621                | 36 (15.5)  | 37 (15.0)  | 0.857                | 91 (18.2)  | 73 (15.2)  | 0.209                |
| Usual consumption of salty additives in food   | 320 (32.7) | 35 (20.3)  | 86 (26.3)  | 0.024                | 101 (43.3) | 98 (39.8)  | 0.294                | 121 (24.2) | 199 (41.5) | < 0.001              |
| Physical activity n(%)                         |            |            |            |                      |            |            |                      |            |            |                      |
| Low                                            | 225 (23.0) | 41 (23.8)  | 106 (32.4) | 0.002                | 35 (15.0)  | 43 (17.5)  | 0.288                | 147 (29.5) | 78 (16.3)  | < 0.001              |
| Sedentary lifestyle                            | 88 (9.0)   | 09 (5.2)   | 36 (11.0)  | < 0.001              | 13 (5.6)   | 30 (12.2)  | < 0.001              | 45 (9.0)   | 43 (9.0)   | 0.982                |

257 P-value<sup>a</sup>:Men-Women comparison in urban areas; P-value<sup>b</sup>:Men-Women comparison in rural areas; P-value<sup>c</sup>:urban-rural comparison.

258

259

260

261 Alcohol consumption was more prevalent than smoking in the general population, men  
262 being the most frequent users, whatever the study area (Table 2). Less than 15% of the study  
263 participants had excessive consumption, rural inhabitants and men were two-fold and 4-fold,  
264 respectively, at a higher risk of being excessive alcohol consumers (Tables 2 and 4).

265 Rural residents were more likely to eat food with additional salty additives than urban  
266 residents (41.5% vs 24.2%;  $p < 0.01$ ) (Table 2). The same trend was observed for women living in  
267 urban cities (Table 2).

268 The mean fruit and vegetable consumption was  $2.8 \pm 2.3$  /day. Only 12.2 % (n = 119/978)  
269 of volunteers consumed the recommended five or more fruits and/or vegetables per day (Table 2).  
270 Neither age nor area statistically influenced the quantity of fruit and vegetable intake, although  
271 women from urban settings had a higher fruit and vegetable consumption compared to men (Table  
272 2). The rate of low physical activity was higher in urban areas (29.5% vs 16.3%;  $p < 0.01$ ), and in  
273 women (26.0%, n=149/573 vs 18.8%, n=76/405;  $p < 0.01$ ) (Table 2).

274

275 **Prevalence of anthropometrics and biological cardiometabolic**  
276 **disease risk factors according to gender and area of residence**

277 Almost, half of the study population had HBP (49.7%) (Table 3). HBP, diabetes,  
278 abdominal obesity, obesity, high LDL-C level, high Total-C level and metabolic syndrome were  
279 significantly more common in urban areas than in rural areas (Table 3).

280

281 **Table 3. Biological risk factors, anthropometric data and number of cardiometabolic disease risk factors according to study area and**  
 282 **gender.**

| Risk factors             | Total      | Urban      |            | P-value <sup>a</sup> | Rural      |            | P-value <sup>b</sup> | Urban      | Rural      | P-value <sup>c</sup> |
|--------------------------|------------|------------|------------|----------------------|------------|------------|----------------------|------------|------------|----------------------|
|                          |            | Men        | Women      |                      | Men        | Women      |                      |            |            |                      |
| HBP n(%)                 | 486 (49.7) | 109 (63.4) | 188 (57.5) | 0.060                | 101 (43.3) | 88 (35.8)  | <b>0.017</b>         | 297 (59.5) | 189 (39.5) | < <b>0.001</b>       |
| Pre-hypertension         | 99 (10.1)  | 22 (12.8)  | 08 (2.4)   | < <b>0.001</b>       | 37 (15.9)  | 32 (13.0)  | 0.197                | 30 (6.0)   | 69 (14.4)  | < <b>0.001</b>       |
| Elevated heart rate      | 345 (35.3) | 25 (14.5)  | 100 (30.6) | < <b>0.001</b>       | 82 (35.2)  | 138 (56.1) | < <b>0.001</b>       | 125 (25.1) | 220 (45.9) | < <b>0.001</b>       |
| Diabetes                 | 53 (5.4)   | 22 (12.8)  | 29 (8.9)   | <b>0.041</b>         | 00 (0.0)   | 02 (0.8)   | 0.132                | 51 (10.2)  | 02 (0.4)   | < <b>0.001</b>       |
| Abdominal obesity        | 288 (29.4) | 23 (13.4)  | 148 (45.3) | < <b>0.001</b>       | 09 (3.9)   | 108 (43.9) | < <b>0.001</b>       | 171 (34.3) | 117 (24.4) | < <b>0.001</b>       |
| Overweight               | 256 (26.2) | 39 (22.7)  | 93 (28.4)  | <b>0.035</b>         | 51 (21.9)  | 73 (29.7)  | <b>0.006</b>         | 132 (26.5) | 124 (25.9) | 0.840                |
| Obesity                  | 233 (23.8) | 29 (16.9)  | 113 (34.6) | < <b>0.001</b>       | 17 (7.3)   | 74 (30.1)  | < <b>0.001</b>       | 142 (28.5) | 91 (19.0)  | < <b>0.001</b>       |
| Low HDL-C level          | 163 (23.1) | 21 (13.6)  | 37 (12.2)  | 0.554                | 47 (47.0)  | 58 (39.5)  | 0.102                | 58 (12.7)  | 105 (42.5) | < <b>0.001</b>       |
| High Triglycerides level | 14 (2.0)   | 03 (1.9)   | 06 (2.0)   | 1.000                | 05 (5.0)   | 00 (0.0)   | --                   | 09 (2.0)   | 5 (2.0)    | 0.818                |
| High LDL-C level         | 45 (6.1)   | 17 (11.0)  | 27 (8.9)   | 0.320                | 00 (0.0)   | 01 (0.7)   | --                   | 44 (9.6)   | 01 (0.4)   | < <b>0.001</b>       |
| High Total-C             | 45 (6.4)   | 14 (9.1)   | 31 (10.2)  | 0.576                | 00 (0.0)   | 00 (0.0)   | --                   | 45 (9.8)   | 00 (0.0)   | --                   |
| Hyperglycemia            | 197 (20.1) | 38 (22.1)  | 75 (22.9)  | 0.761                | 43 (18.5)  | 41 (16.7)  | 0.445                | 113 (22.6) | 84 (17.5)  | 0.464                |
| Metabolic Syndrome       | 122 (12.5) | 17 (9.9)   | 66 (20.2)  | < <b>0.001</b>       | 08 (3.4)   | 31 (12.6)  | < <b>0.001</b>       | 83 (16.6)  | 39 (8.1)   | < <b>0.001</b>       |
| <b>Number of factors</b> |            |            |            |                      |            |            |                      |            |            |                      |
| None                     | 06 (0.6)   | 01 (0.6)   | 02 (0.6)   | 0.682                | 00 (0.0)   | 03 (1.2)   | <b>0.040</b>         | 03 (0.6)   | 03 (0.6)   | <b>0.719</b>         |
| 1                        | 97 (9.9)   | 18 (10.5)  | 35 (10.7)  | 0.917                | 18 (7.7)   | 26 (10.6)  | 0.117                | 53 (10.6)  | 44 (9.2)   | 0.452                |
| 2                        | 198 (20.2) | 37 (21.5)  | 65 (19.9)  | 0.531                | 51 (21.9)  | 45 (18.3)  | 0.170                | 202 (40.5) | 96 (20.0)  | < <b>0.001</b>       |
| 3                        | 275 (28.1) | 42 (24.4)  | 78 (23.9)  | 0.824                | 85 (36.5)  | 70 (28.5)  | <b>0.008</b>         | 120 (24.0) | 155 (32.4) | <b>0.003</b>         |
| 4                        | 253 (25.9) | 46 (26.7)  | 81 (24.8)  | 0.514                | 54 (23.2)  | 72 (29.3)  | <b>0.033</b>         | 127 (25.5) | 126 (26.3) | 0.760                |
| 5                        | 112 (11.5) | 20 (11.6)  | 49 (15.0)  | 0.113                | 19 (8.2)   | 24 (9.8)   | 0.365                | 69 (13.8)  | 43 (9.0)   | <b>0.017</b>         |
| More than 5              | 37 (3.8)   | 8 (4.7)    | 17 (5.2)   | 0.660                | 06 (2.6)   | 06 (2.4)   | 0.832                | 25 (5.0)   | 12 (2.5)   | <b>0.040</b>         |

283 P-value<sup>a</sup>:Men-Women comparison in urban areas; P-value<sup>b</sup>:Men-Women comparison in rural areas; P-value<sup>c</sup>:urban-rural  
 284 comparison. HBP: High blood pressure; LDL-C: Low density lipoprotein-cholesterol; HDL-C: High density lipoprotein-cholesterol;  
 285 Total-C: Total cholesterol.

286

287

288



289           The prevalence of HBP, including participants on medication for hypertension and pre-  
290 hypertension was 59.8% (Table 3). Among the respondents considered with HBP, 97(20%) were  
291 on medication. Men were more likely to have HBP or pre-hypertension than women ( $p < 0.01$ ).  
292 However, while rural inhabitants had a lower prevalence of HBP, they were 1.5 times more at risk  
293 of having pre-hypertension (Table 4). Volunteers aged less than 36 years old were more likely to  
294 have pre-hypertension (10.6%) than older participants (3.9%) ( $p < 0.01$ ). However, 36.5% of  
295 participants aged less than 36 years had HBP, compared to 62.2% of participants aged between 36  
296 and 53 years old and 79.9% of participants who were older than 53 years old.

297

298

299

300

301

302

303

304

305

306

307



|                                                     |                    |         |                     |         |                     |                     |                     |         |
|-----------------------------------------------------|--------------------|---------|---------------------|---------|---------------------|---------------------|---------------------|---------|
| Men                                                 | Ref                |         | Ref                 |         | Urban               | 1.61 (1.22-2.13)    | 1.55 (1.13-2.13)    | 0.006   |
| Women                                               | 7.2 (4.29 – 12.32) | < 0.001 | 20.4 (9.98 – 41.94) | < 0.001 | Rural               | Ref                 |                     |         |
| <b>Low physical activity</b>                        |                    |         |                     |         |                     |                     |                     |         |
| Men                                                 | Ref                |         | Ref                 |         | Urban               | 2.14 (1.57-2.92)    | 2.1(1.54-2.93)      | < 0.001 |
| Women                                               | 1.83 (1.8-2.83)    | 0.006   | 1.33 (0.81-2.18)    | 0.254   | Rural               | Ref                 |                     |         |
| <b>Sedentary lifestyle</b>                          |                    |         |                     |         |                     |                     |                     |         |
| Men                                                 | Ref                |         | Ref                 |         |                     |                     |                     |         |
| Women                                               | 3.04 (1.39-6.65)   | 0.005   | 2.57 (1.28-5.15)    | 0.007   |                     |                     |                     |         |
| <b>Usual consumption of salty additives in food</b> |                    |         |                     |         |                     |                     |                     |         |
|                                                     |                    |         |                     |         | Urban               | Ref                 |                     |         |
|                                                     |                    |         |                     |         | Rural               | 2.22 (1.68-2.91)    | 2.39 (1.8-3.1)      | < 0.001 |
| Low HDL –c level                                    |                    |         |                     |         | Urban               | 0.5 (0.33-0.66)     | 0.2 (0.13 – 0.29)   | < 0.001 |
|                                                     |                    |         |                     |         | Rural               | Ref                 |                     |         |
| High LDL-c level                                    |                    |         |                     |         | Urban               | 46.2 (6.34 - 336.8) | 35.0 (4.7-257.4)    | < 0.001 |
|                                                     |                    |         |                     |         | Rural               | Ref                 |                     |         |
| 2 RF                                                |                    |         |                     |         | Urban               | 2.71 (2.03 - 3.61)  | 1.49 (0.2 - 7.73)   | 0.633   |
|                                                     |                    |         |                     |         | Rural               | Ref                 |                     |         |
| 3 RF                                                |                    |         |                     |         |                     |                     |                     |         |
| Men                                                 |                    |         | 1.13 (0.34-3.76)    | 0.839   | Urban               | 0.66 (0.5 - 0.87)   | 1.20 (0.23 - 6.22)  | 0.824   |
| Women                                               |                    |         | Ref                 |         | Rural               | Ref                 |                     |         |
| 5 RF                                                |                    |         |                     |         | Urban               | 1.62 (1.08-2.4)     | 2.66 (0.49 - 14.20) | 0.252   |
|                                                     |                    |         |                     |         | Rural               | Ref                 |                     |         |
|                                                     |                    |         |                     |         | <b>Number of RF</b> |                     |                     |         |
|                                                     |                    |         |                     |         | <b>One RF</b>       |                     |                     |         |
|                                                     |                    |         |                     |         | 18-35               | Ref                 |                     |         |
|                                                     |                    |         |                     |         | 36-53               | 0.44 (0.27-0.70)    | 0.46 (0.16-1.33)    | 0.154   |
|                                                     |                    |         |                     |         | > 53                | 0.20 (0.07-0.50)    | 0.10 (0.02-0.40)    | 0.001   |
|                                                     |                    |         |                     |         | <b>2 RF</b>         |                     |                     |         |
|                                                     |                    |         |                     |         | 18-35               | Ref                 |                     |         |
|                                                     |                    |         |                     |         | 36-53               | 0.55 (0.39-0.77)    | 0.38 (0.14-1.01)    | 0.055   |

|  |  |  |  |  |                  |                   |                  |       |
|--|--|--|--|--|------------------|-------------------|------------------|-------|
|  |  |  |  |  | > 53             | 0.42 (0.25-0.70)  | 0.17 (0.05-0.49) | 0.001 |
|  |  |  |  |  | <b>3 RF</b>      |                   |                  |       |
|  |  |  |  |  | 18-35            | Ref               |                  |       |
|  |  |  |  |  | 36-53            | 1.09 (0.81-1.46)  | 0.59 (0.22-1.51) | 0.274 |
|  |  |  |  |  | > 53             | 0.9 (0.60-1.35)   | 0.29 (0.10-0.79) | 0.017 |
|  |  |  |  |  | <b>4 RF</b>      |                   |                  |       |
|  |  |  |  |  | 18-35            | Ref               |                  |       |
|  |  |  |  |  | 36-53            | 1.59 (1.16 -2.18) | 0.86 (0.33-2.24) | 0.761 |
|  |  |  |  |  | > 53             | 1.85 (1.26 -2.73) | 0.59 (0.21-1.63) | 0.316 |
|  |  |  |  |  | <b>5 RF</b>      |                   |                  |       |
|  |  |  |  |  | 18-35            | Ref               |                  |       |
|  |  |  |  |  | 36-53            | 1.82 (1.14-2.90)  | 0.84 (0.30-2.32) | 0.743 |
|  |  |  |  |  | > 53             | 2.36 (1.37-4.07)  | 0.55 (0.18-1.62) | 0.281 |
|  |  |  |  |  | <b>&gt; 5 RF</b> |                   |                  |       |
|  |  |  |  |  | 18-35            | Ref               |                  |       |
|  |  |  |  |  | 36-53            | 2.13 (0.90-5.04)  |                  | 0.083 |
|  |  |  |  |  | > 53             | 4.25 (1.73-10.46) |                  | 0.001 |

309 \*AOR adjusted for age/ \*\*AOR adjusted for age and gender / For the number of risk factors, OR was adjusted according to gender, the  
310 education level and occupation. P-value<sup>a</sup>:Men-Women comparison in urban areas; P-value<sup>b</sup>:Men-Women comparison in rural areas; P-  
311 value<sup>c</sup>:urban-rural areas comparison. RF: Risk factor; Ref: Reference; HBP: High blood pressure; LDL-C: Low density lipoprotein-  
312 cholesterol; HDL-C: High density lipoprotein-cholesterol.

313

314

315 The mean waist circumference and BMI were, respectively,  $84.82 \pm 15.53$  cm and  $26.50 \pm$   
316  $6.64$  kg/m<sup>2</sup> in the overall study population. Abdominal obesity was found in more than 20% of the  
317 participants, while the overall prevalence of overweight and obesity was 50.0% (Table 3). Living  
318 in urban areas (aOR: 1.89, 95%CI [1.31-2.63],  $p < 0.01$ ) and female gender (aOR: 4.2, 95%CI  
319 [3.54 – 7.14],  $p < 0.01$ ) were associated with obesity (Table 4). According to age, a higher  
320 prevalence of obesity was seen in adults aged 36-53 years old (34.5%) compared to the oldest  
321 (29.8%) and the youngest (16.4%;  $p < 0.01$ ). The prevalence rate of overweight was comparable  
322 between the three age groups, ranging from 25.0% to 29.1%.

323 The mean ( $\pm$ SD) of Total-C, LDL-c, HDL-C, TG levels were 4.89 ( $\pm$ 1.29) mmol/L, 2.43  
324 ( $\pm$ 1.07) mmol/L, 1.36 ( $\pm$  0.52) mmol/L and 0.82 ( $\pm$  0.52) mmol/L, respectively. Low HDL-C  
325 (23.1%) was the most prevalent dyslipidemia, while the rates of other markers were below 7.0%  
326 (Table 3). There was higher rate of low HDL-C in rural areas. High LDL-C and  
327 hypercholesterolemia were more frequent in inhabitants from urban sites. However, no difference  
328 was observed between men and women for high Total-C levels (5.5% in men vs 6.3% in women;  
329  $p = 0.47$ ), and for high LDL-C (6.7% in men vs 6.2% in women;  $p = 0.92$ ) (Table 3).

330 Our results show a higher trend towards hypertriglyceridemia (3.2% in men vs 1.3% in women;  $p$   
331  $= 0.10$ ) and low HDL-C (26.8% in men vs 21.1% in women;  $p = 0.09$ ) in men compared to women.  
332 The mean Total-c rate was 6.9 ( $\pm$  0.7) mmol/L in the group of volunteers with a high Total-C, the  
333 mean HDL-C rate was 0.69 ( $\pm$  0.23) mmol/L in participants with low HDL-C, the mean LDL-C  
334 rate was 4.91 ( $\pm$  0.93) mmol/L in participants with high LDL-C, and finally, the mean TG was 3.26  
335 ( $\pm$  0.49) mmol/L in the group of volunteers with hypertriglyceridemia.

336 The overall prevalence of diabetes was 5.4% and the prevalence rate of high fasting blood  
337 glucose levels was almost 4-fold higher (Table 3). The hyperglycemia prevalence rate was

338 comparable in urban and rural areas, while 51 out of the 53 volunteers on diabetes medication lived  
339 in urban sites ( $p < 0.01$ ). The burden of both abnormalities was not statistically different according  
340 to gender. The overall prevalence of metabolic syndrome was higher in women (21.7%) than in  
341 men (10.0%;  $p < 0.01$ ) (Table 3).

342

### 343 **Framingham cardiovascular risk score according to urban and rural** 344 **areas**

345 The Framingham risk score for coronary heart disease was assessed only in the group of  
346 the 505 participants aged over 30 years old (296 in urban areas and 209 in rural areas). Overall, 30  
347 (3.4%) participants had a high score, and among these 18 (6.1%) lived in urban settings while only  
348 2 (1.0) resided in rural areas ( $p < 0.01$ ). The rates of people with a moderate score were comparable  
349 in the two areas (12.5% in urban area vs 11.0% in rural area,  $p = 0.61$ ). The prevalence of a high  
350 risk score was significantly lower in men (6.4% in women vs 2.5% in men;  $p=0.03$ ), and in older  
351 participants (13.7% vs 1.4% in those aged between 36-53 years old;  $p < 0.01$ ).

### 352 **Number of cardiometabolic disease risk factors according to gender,** 353 **age group and area of residence**

354 Overall, 972 (99.4%) participants had at least one modifiable CMD risk factor. Participants  
355 frequently had three or four RF (54.0%) and those with the highest number of risk factors resided  
356 in urban areas (Table 3).

357 The number of CMRF per individual significantly varied according to age ( $p < 0.01$ ) (Fig  
358 1). The majority of healthy volunteers aged under 36 years old (70.9%;  $n = 299/422$ ) had three RF  
359 or less; two thirds of the oldest participants (60.3%,  $n = 97/161$ ) had four RF or more, while the  
360 middle-aged volunteers had more frequently (60.0%,  $n = 237/395$ ) three to four CMRF (Fig 2).

361 **Fig 2. Number of cardiometabolic disease risk factors according to age groups.**

362

## 363 Discussion

364 The burden of NCD is rapidly growing worldwide, including in SSA where populations  
365 also suffer from the burden of infectious diseases. Public health efforts mainly focus on reducing  
366 the burden of the three main infectious diseases (malaria, HIV/AIDS and tuberculosis) and  
367 neglected tropical diseases (NTDs). However, reports on the increasing death rate associated with  
368 CVD are on the rise for SSA [12, 20]. In addition, data from Central Africa are scarce, although  
369 the living conditions of local populations are not significantly different from other low-middle-  
370 income-countries in SSA. This lack of reliable data is an obstacle for (i) the consideration of NCD  
371 as serious public health issue, and (ii) for the design and planning of efficient preventive strategies  
372 tailored to the population, in order to reduce the silent and neglected impact of NCD.

373 This study shows a considerable high prevalence of individual NCD risk factors in people  
374 living in urban and rural settings in Gabon.

375 To date, there was no recorded data on the prevalence of daily tobacco use and harmful  
376 alcohol consumption in Gabon, although these behaviors are noticed among young adults. The  
377 prevalence of daily tobacco use was higher than that observed in young Gabonese students (19.2%

378 vs 14%), in Kenyan adults (13.5%) and in global reports from SSA [14, 21, 22]. The fact that men  
379 are more likely to be smokers than women is currently reported worldwide [9, 23]. However, an  
380 unusual higher prevalence of daily tobacco users in rural areas (19.2%) compared to urban settings  
381 (2.8%) was observed. In SSA countries, the smoking prevalence rate was found to be 40% in urban  
382 areas versus 20% in rural areas [24]. Approximately, 25% of the study population were exposed  
383 to passive smoking at work or home. Although Gabon has adopted and designed preventive  
384 strategies after implementing the anti-smoking law in 2013, it seems that awareness campaigns are  
385 insufficient in the country and have difficulty reaching rural communities with lower school  
386 attendance. This study emphasizes the need to continue data collection and to consider gender and  
387 sociodemographic factors, in order to tailor preventive strategies to target populations. Rural  
388 communities must be better informed and included in the preventive programs for NCD.

389         Smoking and alcohol consumption are two RF for CMD which often occur together.  
390 Excessive alcohol consumption was more prevalent in men and in rural settings as observed  
391 elsewhere [9, 10]. Alcohol and tobacco consumption in women is traditionally considered as  
392 abnormal or incorrect (immoral) in Gabon, while it is more accepted for men, this could explain  
393 the difference highlighted according to gender. It is important to note that this gender difference is  
394 only observed for the excessive consumption of tobacco or alcohol, whatever the level of  
395 urbanization. Surprisingly, smoking and alcohol consumption were more often reported by rural  
396 inhabitants. Alcohol shops are easily accessible in urban settings, but local production is frequent  
397 in rural settings. Each family can have its own palm plantation and sugar cane fields as well as  
398 homemade stills, and therefore have the possibility of producing its own palm wine or cane sugar  
399 liqueur whose alcohol level can exceed 30%. The two drinks, which are very popular in local  
400 communities, are very often consumed without moderation.



401 An unhealthy diet and insufficient physical activity are common in the study population,  
402 with prevalence rates comparable to findings from other African countries. Indeed, the prevalence  
403 of low fruit and vegetable intake is in line with reports from Tanzania (82%) and Ethiopia (95%)  
404 [25, 26]. There was no difference according to gender or the geographic location. This could be  
405 due to the population's dietary habits and their similar access to various fruits and vegetables. Most  
406 participants in this study (74%) did not have a sufficient and regular income which would allow  
407 them to buy and consume several fruits and vegetables on a daily basis. In addition, the eating  
408 habits of the population depend on the seasonal availability of foods and also on the geographic  
409 area. Although agriculture is the main activity in rural areas and these are the main supplier of local  
410 fruits and vegetables, the availability of these is seasonal and there is only very little variety and  
411 quantity: certain fruits are found in a region at a given time, and not necessarily in another. In  
412 addition, the average Gabonese meal consists of a starchy food and meat or fish for lunch, which  
413 is the main meal of the day. The consumption of fruit for snacks or dessert is only possible for  
414 people who have sufficient income to buy expensive imported fruits and vegetables every day. The  
415 questionnaire used during the interviews did not take into account the local context to gather data  
416 on the availability and specificities of local foods; future studies should adapt the questions  
417 accordingly. Gabonese government policies should promote healthy eating habits, for example by  
418 making healthy foods available at reduced prices in urban areas and by providing agricultural land  
419 and mechanical tools dedicated to agriculture in rural areas.

420 The prevalence rate of high salt intake in cooking and dietary habits was not negligible. It  
421 reached 42% in total when the consumption of processed food with salt was combined with the  
422 addition of salt during meals. The higher prevalence observed in rural areas could be explained by  
423 the absence of preventive information about the risk of CVD when eating more than 5g of salt per

424 day, but also by the fact that cardiologists, who usually provide such education and counselling,  
425 are lacking in rural areas.

426 The overall prevalence of low physical activity is 22% in SSA, which is in line with the  
427 results in our present study (23%). The higher proportion of women and urban participants with  
428 insufficient physical activity seems to be common in low- and middle-income countries [27]. The  
429 sedentary lifestyle (at home and at work) in urban cities and the fact that men do more physical  
430 work compared to women might partly be in cause.

431 The prevalence rate of overweight and obesity in the study population is cause for concern  
432 as it amounts to 50%. This is very high compared to reports from other SSA countries such as  
433 Mozambique (30%) and Zambia (24.4%) [28, 29]. The prevalence of central obesity (29%) was  
434 however comparable to data from these countries. Obesity is the consequence of energy imbalance  
435 between the type and quantity of food consumed and insufficient physical activity. The  
436 predominance of both CMRF among women and the urban population of this study justify the  
437 observed higher predominance of overweight/obesity and central obesity in these two groups. Our  
438 results are in accordance with other data in African countries where the prevalence rate of  
439 overweight/obesity has doubled within the last two decades, with the highest burden found in  
440 women and urban inhabitants [30, 31]. The westernized and sedentary lifestyle of urban  
441 populations of low-middle-income-countries results in infrequent physical inactivity during free  
442 time, more time spent in offices in front of computers, increased use of public transportation, and  
443 the increased consumption of processed foods and junk foods, which are all causal factors for  
444 overweight/obesity. In Libreville, the work is carried out in a continuous day with a break of less  
445 than an hour. Workers therefore do not have the possibility of returning home to have a balanced  
446 lunch, the majority having lunch in fast food outlets where fried foods and meals rich in oil and

447 salt are most frequently available. This poor lifestyle may explain the higher prevalence of obesity  
448 in the group of patients aged 35 to 53 years old, which is the most professionally active in our study  
449 population.

450 Hypertension is the leading CMRF in Africa, its prevalence is the highest in the world,  
451 ranging from 17% to 70% [32]. Almost half (49.7%) of the interviewed persons in our study had a  
452 high blood pressure, which is consistent with a previous report from the main hospital in Libreville,  
453 but considerably higher compared to studies from Oman (33) [33, 34]. Although the differences  
454 could be due to the cross-sectional study design and other parameters such as the stress of the  
455 participants during the physical examination, these findings are a matter of grave concern for  
456 physicians, health workers, and policy makers. Indeed, the prevalence of participants on medication  
457 is still high (20%). Our findings also suggest that more than 25% of the population were not aware  
458 of their health status or were undiagnosed, and thus would remain untreated, increasing the risk of  
459 ischemic attack. There is an urgent need for preventive efforts, better diagnostics, high treatment  
460 coverage, and awareness campaigns on the causes and consequences hypertension. The prevalence  
461 of HBP was lower in rural settings in this study, it reached 39% in areas where it is known that  
462 awareness campaign and annual systematic screening and treatment are not often accessible. A  
463 recent study conducted in Libreville revealed an HBP prevalence rate of nearly 20% among  
464 adolescents [14]. Altogether, these results suggest that HBP is a major public health problem in  
465 Gabon and that there is an urgent need to implement control and prevention strategies. These  
466 findings also highlight the need for an integrated approach of NCD for prevention in urban and  
467 remote rural areas.

468 The risk of developing a CVD increases with high fasting blood glucose levels; more than  
469 20 million African individuals live with diabetes [35]. Data on the prevalence of diabetes in Central

470 Africa are sparse. The prevalence rate of diabetes was 5.4% in this study, which is in line with  
471 studies from Cameroon (5.6%), Burkina Faso (5.2%) [36, 37]. However, not surprisingly 97% of  
472 the diabetic participants lived in urban areas, and as such the prevalence rate was higher (10.2%)  
473 than in rural areas. The prevalence of hyperglycemia was much higher than that of diabetes, and it  
474 was comparable in urban and rural settings. Beyond the deaths directly attributable to diabetes,  
475 hyperglycemia is responsible for a heavy burden of mortality [38]. It is therefore urgent to  
476 implement a strategy to treat patients in the pre-diabetes stage in order to avoid a progression of  
477 the disease to diabetes and its medical and economic consequences.

478 Effective detection and treatment of dyslipidemia are recommended to reduce  
479 cardiovascular diseases in Africa. The burden of these biological risk factors is increasing in SSA  
480 [20]. Low HDL-C level was the most frequent detected dyslipidemia (23.1%), which is consistent  
481 with data from SSA (20-40%) [39]. High Total-C (6.4%) and hypertriglyceridemia (6.3%)  
482 prevalence rates were lower than the majority reported data from other SSA countries [39, 40].  
483 However, the concerning prevalence rate of the metabolic syndrome (12.5%), which is a precursor  
484 of CVD and diabetes, is in line with rates from SSA (16%) [41]. Women and urban populations  
485 are the most concerned. This is not surprising because related behavioral risk factors were also  
486 found to predominate in these groups. Pre-HBP (14.4% vs 6.0%), elevated heart rate (45.9% vs  
487 25.1%) and low HDL-C (42.5% vs 12.7%) levels were predominant in rural areas. These results  
488 could reflect an ongoing epidemiologic transition, in rural areas.

489 Less than 1% of the apparently healthy study participants had no CMRF. More than 80%  
490 had at least two NCD risk factors, although persons living in urban sites (18.8%) were more likely  
491 to have more than three RF than rural inhabitants (11.5%). In Kenya, the majority (75%) of adults

492 screened had at least four RF [42]. As observed elsewhere, increasing age and urban residence  
493 were associated with a higher number of CMRF [28].

494 According to the Framingham risk score, people at a high risk of suffering from a cardiovascular  
495 event in next 10 years were more likely to live in urban areas than in rural areas (6.08% vs 0.95%),  
496 as reported in Myanmar [9]. These results are not surprising as the variables considered in the  
497 calculation of the Framingham risk score were found in high prevalence rates in urban sites.

498 Urban inhabitants had the most risk factors and older people had a higher number of RF. It  
499 has been suggested that the risk of cardiovascular events increase with particular combinations of  
500 risk factors as well as their total number [43, 44]. As an example, hypertension associated with the  
501 elderly may be combined with several others RF. Thus, strategies to reduce RF in the population  
502 should be adapted to target the population according to the areas.

503 This is the first study which assessed CMRF both in urban and rural areas of Gabon, were  
504 no data were previously recorded. A standardized approach was used, making the generated data  
505 comparable to other countries. Data was collected by well-trained team members, and the presence  
506 of a field worker living in each of the study area and speaking the native language, facilitated  
507 exchanges with the populations in rural localities. However, although the Framingham risk  
508 equation was used to assess the 10-year risk score of cardiovascular events, it has not been validated  
509 in African populations. The development and validation of a region-specific risk estimation  
510 equation is much needed. The recorded data were self-reported through face-to face interviews on  
511 personal lifestyle. Thus, the participants may tend to say what is acceptable or correct instead of  
512 being honest. As a consequence, alcohol and tobacco consumption could be under-reported.  
513 Moreover, the measurement of salt in urine was not performed to assess the reliability of the  
514 volunteers estimates of their salting habits. Lastly, this study was cross-sectional and did not assess

515 environmental and genetic risk factors. Despite these limitations, the data in this study provide  
516 useful baseline information on the burden of CMRF and could be used by policy makers and control  
517 programs.

## 518 **Conclusion**

519 This study provides essential information on CND indicators in Gabon. The prevalence of  
520 modifiable CMD risk factors was high both in urban and rural study sites. Gender differences in  
521 risk factor prevalence was observed. The high prevalence of multiple RF per individual indicates  
522 the urgent need to implement effective preventive programs as well as the detection, treatment and  
523 prevention of related cardiovascular and metabolic diseases. Other surveys with larger sample  
524 populations and specific groups such as youth, elderly, pregnant women and HIV-infected persons  
525 should also be performed.

## 526 **Acknowledgements**

527 The authors would like to thank the EDCTP2 program for funding this work. Many thanks to the  
528 Département de Parasitologie-Mycologie, Université des Sciences de la Santé, Owendo Gabon, as  
529 well as the staff of the Centre de Recherche Biomédicale en Pathogènes Infectieux et Pathologies  
530 Associées (CREIPA) of Melen for their help in carrying out this work.

## 531 **References**

- 532 1. World Health Organization. Cardiovascular diseases report 2021[Internet].[cited 15 Jun  
533 2022]. Available from: [https://www.who.int/news-room/fact-sheets/detail/cardiovascular-](https://www.who.int/news-room/fact-sheets/detail/cardiovascular-diseases-(cvds))  
534 [diseases-\(cvds\)](https://www.who.int/news-room/fact-sheets/detail/cardiovascular-diseases-(cvds)).

- 535 2. Institute for Health Metrics and Evaluation. GBD Compare Data Visualization 2020  
536 [Internet].[cited 14 Dec 2022]. Available from: <http://vizhub.healthdata.org/gbd-compare>.
- 537 3. Mudie K, Jin MM, Kendall L, Addo J, dos-Santos-Silva I, Quint J, et al. Non-  
538 communicable diseases in sub-Saharan Africa: a scoping review of large cohort studies. *J*  
539 *Glob Health*. 2019 Dec; 9(2).doi:10.7189/jogh.09.020409.
- 540 4. Teo KK, Rafiq T. Cardiovascular Risk Factors and Prevention: A Perspective From  
541 Developing Countries.*CJC*. 2021 May; 37(5):733-43.doi:10.1016/j.cjca.2021.02.009.
- 542 5. Popkin BM, Adair LS, Ng SW. Global nutrition transition and the pandemic of obesity in  
543 developing countries.*Nutr Rev*.2012 Jan; 70(1):3-21.doi:10.1111/j.1753-  
544 4887.2011.00456.x.
- 545 6. Sliwa K, Acquah L, Gersh BJ, Mocumbi AO. Impact of socioeconomic status, ethnicity,  
546 and urbanization on risk factor profiles of cardiovascular disease in Africa. *Circulation*.  
547 2016 Mar; 133(12):1199-208.doi:10.1161/CIRCULATIONAHA.114.008730.
- 548 7. Sobngwi E, Mbanya JN, Unwin N, Kengne A, Fezeu L, Minkoulou E, et al. Physical  
549 activity and its relationship with obesity, hypertension and diabetes in urban and rural  
550 Cameroon. *Int J Obes Relat Metab Disord*. 2002 Jul; 26(7):1009-  
551 16.doi:10.1038/sj.ijo.0802008.
- 552 8. Soubeiga JK, Millogo T, Bicaba BW, Doulogou B, Kouanda S. Prevalence and factors  
553 associated with hypertension in Burkina Faso: a countrywide cross-sectional study. *BMC*  
554 *Public Health*. 2017 Jan; 17(1):64.doi:10.1186/s12889-016-3926-8.
- 555 9. Htet AS, Bjertness MB, Sherpa LY, Kjøllesdal MK, Oo WM, Meyer HE, et al. Urban-rural  
556 differences in the prevalence of non-communicable diseases risk factors among 25–74  
557 years old citizens in Yangon Region, Myanmar: a cross sectional study. *BMC Public*  
558 *Health*. 2016 Dec; 16(1):1-12.doi:10.1186/s12889-016-3882-3.

- 559 10. Houehanou YCN, Lacroix P, Mizehoun GC, Preux P-M, Marin B, Houinato DS. Magnitude  
560 of cardiovascular risk factors in rural and urban areas in Benin: findings from a nationwide  
561 steps survey. PLoS One. 2015 May;10(5):e0126441. doi:10.1371/journal.pone.0126441.
- 562 11. Ayo Bivigou E, Igala M, Manomba C, Allognon C, Ndoume F, Yekini C, et al. Profile of  
563 cardiovascular manifestations in COVID-19 patients at the Libreville university hospital  
564 center, Gabon. Arch Cardiovasc Dis Suppl. 2022 Jan; 14(1):127-127.  
565 doi:10.1016/j.acvdsp.2021.10.006.
- 566 12. Ngoungou EB, Aboyans V, Kouma P, Makandja R, Nzengue JEE, Allogho CN, et al.  
567 Prevalence of cardiovascular disease in Gabon: a population study. Arch Cardiovasc Dis.  
568 2012 Feb;105(2):77-83. doi:10.1016/j.acvd.2011.12.005.
- 569 13. Organisation mondiale de la Santé. Bureau régional de l'Afrique. Stratégie de coopération  
570 OMS dans le pays 2016-2021 : Gabon. World Health Organization Regional Office for  
571 Africa 2016 [Internet].[cited 16 Nov 2022] Available from:  
572 <https://apps.who.int/iris/handle/10665/254892>.
- 573 14. Bivigou EA, Ditombi BM, Nguema OM, Moutongo R, Pongui B, Ekomi BB, et al.  
574 Hypertension and prehypertension: prevalence and associated factors in Gabonese Youth  
575 and Adolescents. 2020 [Internet].[cited 18 Oct 2022]. Available from  
576 [https://assets.researchsquare.com/files/rs-24889/v2/84500846-5261-445c-9b73-  
577 ce5361b5f540.pdf?c=1631845768](https://assets.researchsquare.com/files/rs-24889/v2/84500846-5261-445c-9b73-ce5361b5f540.pdf?c=1631845768). doi:10.21203/rs.3.rs-24889/v2.
- 578 15. World Health Organization. Global status report on noncommunicable diseases 2014; one  
579 more landmark step in the combat against stroke and vascular disease.2014 [Internet].[cited  
580 18 Oct 2022].Available from: <https://apps.who.int/iris/handle/10665/148114>.
- 581 16. World Health Organization. The WHO STEPwise approach to chronic disease risk factor  
582 surveillance (STEPS). Geneva, Switzerland: WHO. Contract No.: Document Number.



- 583 2008[Internet].[cited 25 Mar 2020]. Available from:  
584 [https://www.who.int/teams/noncommunicable-diseases/surveillance/systems-](https://www.who.int/teams/noncommunicable-diseases/surveillance/systems-tools/steps/manuals)  
585 [tools/steps/manuals](https://www.who.int/teams/noncommunicable-diseases/surveillance/systems-tools/steps/manuals).
- 586 17. Zimmet P, Alberti K, Shaw J. International Diabetes Federation: the IDF consensus  
587 worldwide definition of the metabolic syndrome. *Diabet Med*. 2006 May; 50:31-3.  
588 doi:10.1111/j.1464-5491.2006.01858.x.
- 589 18. National Cholesterol Education Program (NCEP). Expert Panel on Detection, Evaluation,  
590 and Treatment of High Blood Cholesterol in Adults (Adult Treatment Panel III) final report.  
591 2002 [Internet].[ 11 Dec 2022]Available from: [https://www.aefa.es/wp-](https://www.aefa.es/wp-content/uploads/2014/04/NECP-guidelines-.pdf)  
592 [content/uploads/2014/04/NECP-guidelines-.pdf](https://www.aefa.es/wp-content/uploads/2014/04/NECP-guidelines-.pdf).
- 593 19. Wilson PW, D'Agostino RB, Levy D, Belanger AM, Silbershatz H, & Kannel WB.  
594 Prediction of coronary heart disease using risk factor categories. *Circulation*.1998 May;  
595 97(18). 1837–1847.doi:10.1161/01.cir.97.18.1837.
- 596 20. Yuyun MF, Sliwa K, Kengne AP, Mocumbi AO, Bukhman G. Cardiovascular diseases in  
597 sub-Saharan Africa compared to high-income countries: an epidemiological perspective.  
598 *Glob Heart*. 2020 Feb; 15(1). doi:10.5334/gh.403.
- 599 21. World Health Organization. WHO global report on trends in prevalence of tobacco use  
600 2000–2025. 2021[Internet].[cited 15 Dec 2022]. Available from:  
601 [https://www.who.int/publications/i/item/who-global-report-on-trends-in-prevalence-of-](https://www.who.int/publications/i/item/who-global-report-on-trends-in-prevalence-of-tobacco-use-2000-2025-third-edition)  
602 [tobacco-use-2000-2025-third-edition](https://www.who.int/publications/i/item/who-global-report-on-trends-in-prevalence-of-tobacco-use-2000-2025-third-edition).
- 603 22. Mwangi KJ, Mwenda V, Gathecha G, Beran D, Guessous I, Ombiro O, et al. Socio-  
604 economic and demographic determinants of non-communicable diseases in Kenya: a  
605 secondary analysis of the Kenya stepwise survey. *Pan Afr Med J*. 2020 Dec; 37.  
606 doi:10.11604/pamj.2020.37.351.21167.

- 607 23. Peltzer K, Pengpid S. Tobacco use, beliefs and risk awareness in university students from  
608 24 low, middle and emerging economy countries. *Asian Pac J Cancer Prev.*  
609 2014;15(22):10033-8. doi:10.7314/apjcp.2014.15.22.10033.
- 610 24. Reitsma MB, Fullman N, Ng M, Salama JS, Abajobir A, Abate KH, et al. Smoking  
611 prevalence and attributable disease burden in 195 countries and territories, 1990–2015: a  
612 systematic analysis from the Global Burden of Disease Study 2015. *Lancet.* 2017 May;  
613 389(10082):1885-906. doi:10.1016/S0140-6736(17)30819-X.
- 614 25. Msambichaka B, Eze IC, Abdul R, Abdulla S, Klatser P, Tanner M, et al. Insufficient fruit  
615 and vegetable intake in a low-and middle-income setting: a population-based survey in  
616 semi-urban Tanzania. *Nutrients.* 2018 Feb; 10(2):222. doi:10.3390/nu10020222.
- 617 26. Motuma A, Demissie Regassa L, Gobena T, Teji Roba K, Berhane Y, Worku A. Almost  
618 all working adults have at least one risk factor for non-communicable diseases: Survey of  
619 working adults in Eastern Ethiopia. *PloS one.* 2022 Feb; 17(2):e0264698.  
620 doi:10.1371/journal.pone.0264698.
- 621 27. Pengpid S, Peltzer K, Kassean HK, Tsala Tsala JP, Sychareun V, Müller-Riemenschneider  
622 F. Physical inactivity and associated factors among university students in 23 low-, middle-  
623 and high-income countries. *Int J Public Health.* 2015 Jul; 60(5):539-49.  
624 doi:10.1007/s00038-015-0680-0.
- 625 28. Pengpid S, Peltzer K. Prevalence and correlates of multiple non-communicable disease risk  
626 factors among adults in Zambia: Results of the first national STEPS survey in 2017. *Pan  
627 Afr Med J.* 2020 Nov; 37:265. doi: 10.11604/pamj.2020.37.265.25038.

- 628 29. Fontes F, Damasceno A, Jessen N, Prista A, Silva-Matos C, Padrão P, et al. Prevalence of  
629 overweight and obesity in Mozambique in 2005 and 2015. *Public Health Nutr.* 2019 Dec;  
630 22(17):3118-26. doi:10.1017/S1368980019002325.
- 631 30. Amugsi DA, Dimbuene ZT, Mberu B, Muthuri S, Ezeh AC. Prevalence and time trends in  
632 overweight and obesity among urban women: an analysis of demographic and health  
633 surveys data from 24 African countries, 1991–2014. *BMJ Open.* 2017 Oct; 7(10):e017344.  
634 doi:10.1136/bmjopen-2017-017344.
- 635 31. The Global Health Observatory. Noncommunicable Diseases: Risk factors  
636 2022[Internet].[cited 2 Dec 2022]. Available from:  
637 <https://www.who.int/data/gho/data/themes/topics/topic-details/GHO/ncd-risk-factors>.
- 638 32. World Health Organization. Hypertension [Fact sheet] 2021 [Internet].[cited 2 December  
639 2022]. Available from: <https://www.who.int/news-room/fact-sheets/detail/hypertension>.
- 640 33. Bivigou EA, Allognon MC, Ndoume F, Mipinda JB, Nzengue EE. Létalité de l'insuffisance  
641 cardiaque au Centre Hospitalier Universitaire de Libreville (CHUL) et facteurs associés.  
642 *Pan African Medical Journal.* 2018 Sep; 31(1). doi :10.11604/pamj.2018.31.27.13259.
- 643 34. Al-Mawali A, Jayapal SK, Morsi M, Al-Shekaili W, Pinto AD, Al-Kharusi H, et al.  
644 Prevalence of risk factors of non-communicable diseases in the Sultanate of Oman: STEPS  
645 survey 2017. *PLoS One.* 2021 Oct; 16(10):e0259239. doi:10.1371/journal.pone.0259239.
- 646 35. Sarwar N, Gao P, Seshasai S, Gobin R, Kaptoge S, Di Angelantonio E, et al. Emerging  
647 Risk Factors Collaboration Diabetes mellitus, fasting blood glucose concentration, and risk  
648 of vascular disease: a collaborative meta-analysis of 102 prospective studies. *Lancet.* 2010  
649 Jun; 375(9733):2215-22. doi:10.1016/S0140-6736(10)60484-9.

- 650 36. Bigna JJ, Nansseu JR, Katte J-C, Noubiap JJ. Prevalence of prediabetes and diabetes  
651 mellitus among adults residing in Cameroon: a systematic review and meta-analysis.  
652 *Diabetes Res Clin Pract.* 2018 Mar; 137:109-18. doi:10.1016/j.diabres.2017.12.005.
- 653 37. Millogo T, Bicaba BW, Soubeiga JK, Dabiré E, Médah I, Kouanda S. Diabetes and  
654 abnormal glucose regulation in the adult population of Burkina Faso: prevalence and  
655 predictors. *BMC Public Health.* 2018 Mar; 18(1):1-10. doi:10.1186/s12889-018-5257-4.
- 656 38. Danaei G, Finucane MM, Lu Y, Singh GM, Cowan MJ, Paciorek CJ, et al. National,  
657 regional, and global trends in fasting plasma glucose and diabetes prevalence since 1980:  
658 systematic analysis of health examination surveys and epidemiological studies with 370  
659 country-years and 27 million participants. *Lancet.* 2011 Jul; 378(9785):31-40.  
660 doi:10.1016/S0140-6736(11)60679-X.
- 661 39. Gebreyes YF, Goshu DY, Geletew TK, Argefa TG, Zemedu TG, Lemu KA, et al.  
662 Prevalence of high bloodpressure, hyperglycemia, dyslipidemia, metabolic syndrome and  
663 their determinants in Ethiopia: Evidences from the National NCDs STEPS Survey, 2015.  
664 *PloS one.* 2018 May;13(5):e0194819. doi: 10.1371/journal.pone.0194819.
- 665 40. Njelekela M, Kuga S, Nara Y, Ntogwisangu J, Masesa Z, Mashalla Y, et al. Prevalence of  
666 obesity and dyslipidemia in middle-aged men and women in Tanzania, Africa: relationship  
667 with resting energy expenditure and dietary factors. *J Nutr Sci Vitaminol* 2002 Oct;  
668 48(5):352-8. doi:10.3177/jnsv.48.352.
- 669 41. Fajjer-Westerink HJ, Kengne AP, Meeks KA, Agyemang C. Prevalence of metabolic  
670 syndrome in sub-Saharan Africa: A systematic review and meta-analysis. *Nutr Metab*  
671 *Cardiovasc Dis.* 2020 Apr; 30(4):547-65. doi:10.1016/j.numecd.2019.12.012.

- 672 42. Wekesah FM, Nyanjau L, Kibachio J, Mutua MK, Mohamed SF, Grobbee DE, et al.  
673 Individual and household level factors associated with presence of multiple non-  
674 communicable disease risk factors in Kenyan adults. BMC Public Health. 2018 Nov;  
675 18(3):1-11. doi:10.1186/s12889-018-6055-8.
- 676 43. Lowe LP, Greenland P, Ruth KJ, Dyer AR, Stamler R, Stamler J. Impact of major  
677 cardiovascular disease risk factors, particularly in combination, on 22-year mortality in  
678 women and men. Arch Intern Med. 1998 Oct; 158(18):2007-14. doi:  
679 10.1001/archinte.158.18.2007.
- 680 44. Yusuf HR, Giles WH, Croft JB, Anda RF, Casper ML. Impact of multiple risk factor  
681 profiles on determining cardiovascular disease risk. Prev Med.1998 Jan-Feb; 27(1):1-9. doi:  
682 10.1006/pmed.1997.0268.

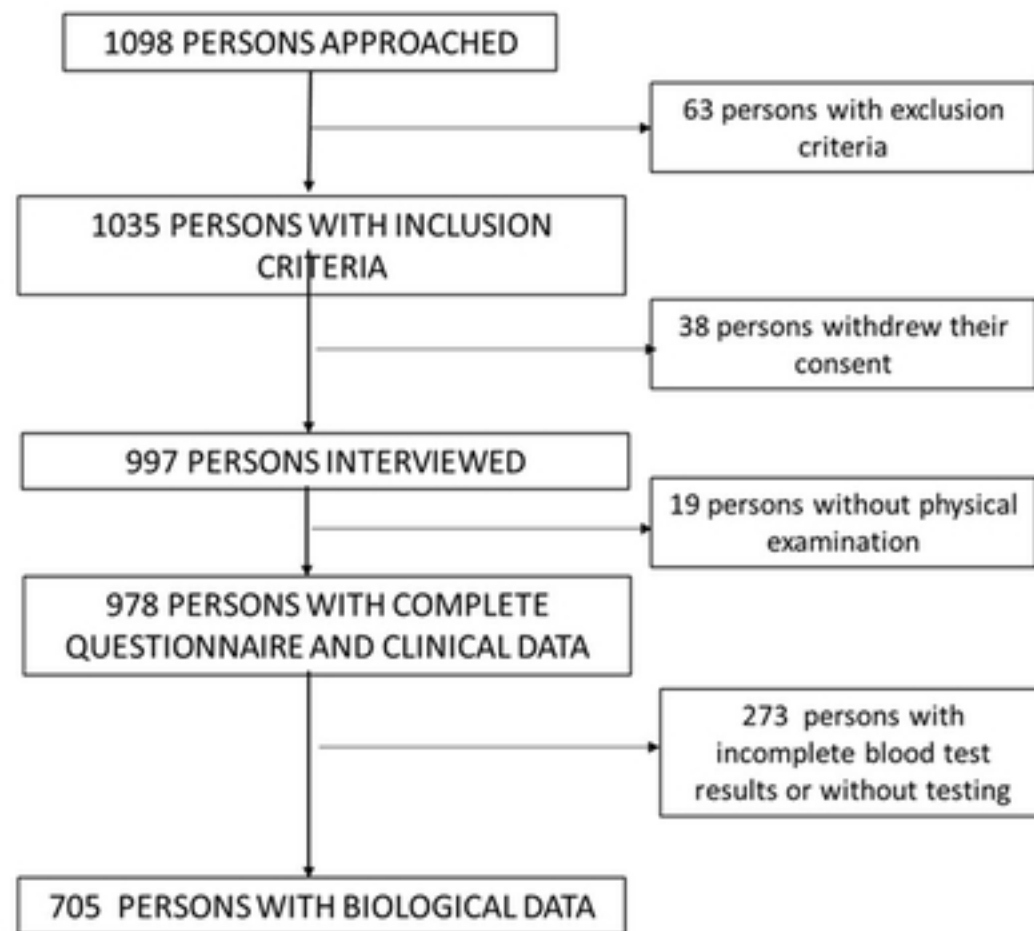

Fig 1: Study flow chart

Figure

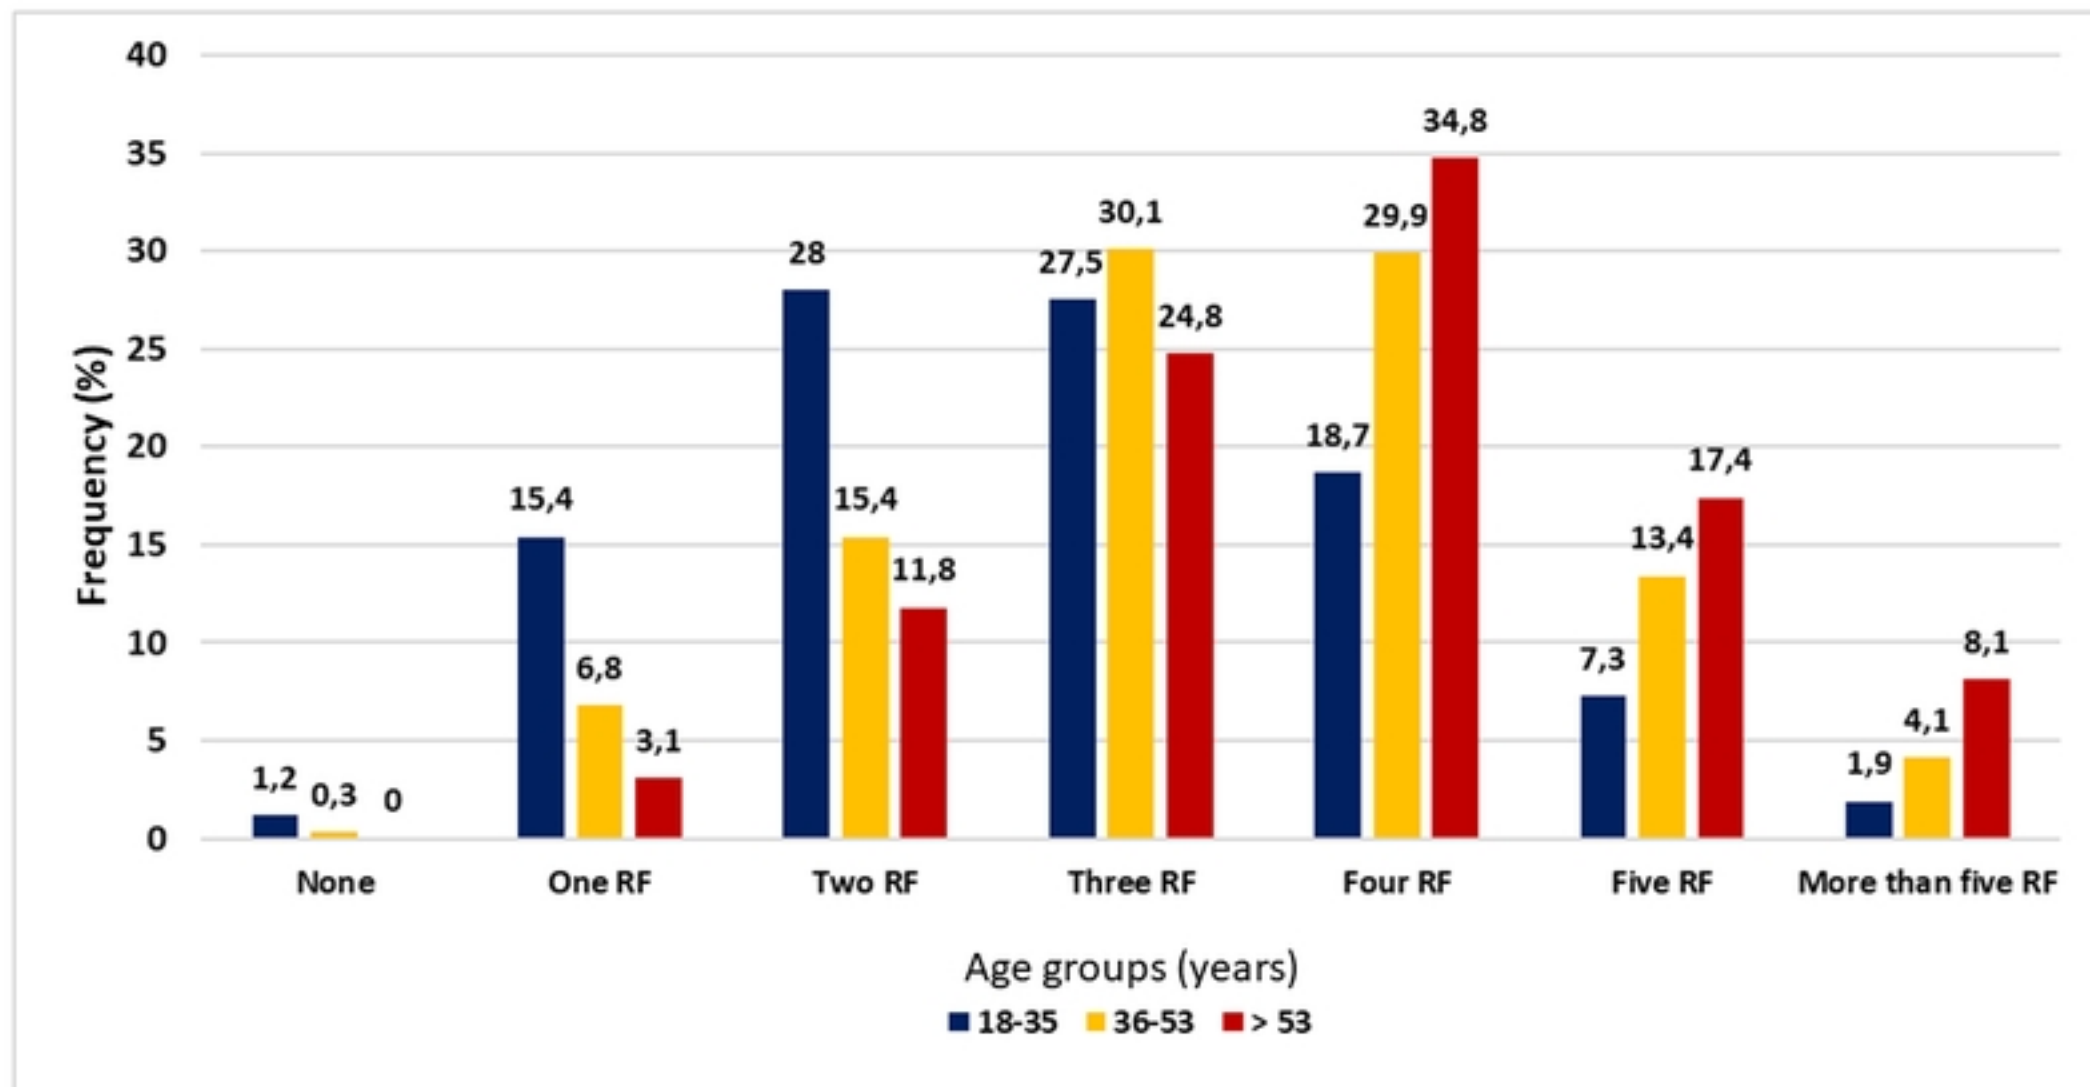

Figure
